# Supplementary material
Source: publisher site journal article supplement (https://www.spandidos-publications.com/8509/downloadSupplementary)
Supplement: Supplementary file 1 [file downloadSupplementary]

## Sheet: Sheet1
Table SII. List of 63 glycolysis-related genes and their direction.
Gene	conMean	treatMean	log fold-change	P-value	Adjusted P-value	Type
AGL	6.93091777142857	6.87329288888889	-0.0576249	0.000451722173502557	0.00168527118575954	Down
AGRN	6.93881994285714	7.12515622222222	0.186336279365079	2.9046597282775e-07	2.08705180476235e-06	Up
AK3	8.41384	8.12422619444444	-0.289611	4.2632218361799e-07	2.95380370078179e-06	Down
ALDOA	8.25276694285714	8.68033413888889	0.427567196031745	5.91359117173699e-09	6.74845110186457e-08	Up
ANKZF1	7.16281	7.06494	-0.0978749	0.000121666102077144	0.000491733829228458	Down
ARPP19	8.37591508571429	8.25815330555556	-0.117762	0.00172397359926983	0.0058675592676903	Down
AURKA	6.72788848571429	6.82013061111111	0.0922421253968251	5.48817062271862e-05	0.000236601133512758	Up
CD44	9.79943028571429	10.2839661111111	0.484535825396826	5.08207560292416e-10	7.04230476405205e-09	Up
CHPF2	7.05665045714286	7.14640561111111	0.0897551539682535	0.00623699907313904	0.0195157712933705	Up
CHST2	7.15312468571429	7.49279355555556	0.33966886984127	2.97493256692202e-05	0.000140765101947042	Up
CITED2	9.19247774285714	8.87136302777778	-0.321115	6.52863640334644e-06	3.42312287094381e-05	Down
COG2	8.00407477142857	7.75993261111111	-0.244142	9.72806157628833e-06	4.96643143631562e-05	Down
COPB2	8.23154385714286	8.35624	0.124696892857143	0.00144339696941205	0.00500033950117747	Up
DDIT4	8.54561331428571	10.1502982222222	1.60468490793651	6.18287562718192e-18	1.19947787167329e-15	Up
DSC2	6.85835537142857	7.16513683333333	0.306781461904762	8.02909691460276e-09	8.19813053385755e-08	Up
ENO1	11.4017226571429	11.8370892777778	0.435366620634921	6.45086717777267e-08	5.21445096869957e-07	Up
GALK2	7.12943228571429	7.05648052777778	-0.0729518	0.000121666102077144	0.000491733829228458	Down
GCLC	7.14311828571429	6.95882352777778	-0.184295	1.47554405702382e-08	1.36312165267915e-07	Down
GLRX	10.7042565428571	11.4733093055556	0.769052762698413	6.85566381522545e-12	1.89999825736248e-10	Up
GNE	7.79304177142857	7.88383169444444	0.0907899230158726	0.0131903063215615	0.040617768672745	Up
GNPDA1	8.75071	9.32127394444444	0.570560344444445	3.8910256332579e-12	1.50971794570406e-10	Up
GOT2	8.37128997142857	8.16339852777778	-0.207891	4.70539637687265e-06	2.53568582531471e-05	Down
GPC4	6.67793951428571	6.58242894444444	-0.0955106	0.00248677931122459	0.00804058643962618	Down
GUSB	8.46498305714286	8.26593311111111	-0.19905	4.45346877517519e-06	2.46849412109711e-05	Down
HK2	7.75775911428571	9.00455294444444	1.24679383015873	8.44371608038968e-11	1.6380809195956e-09	Up
IER3	9.54979337142857	11.8868281944444	2.33703482301587	2.44815793423025e-11	5.93678299050836e-10	Up
IGFBP3	7.00198291428571	6.83415072222222	-0.167832	2.40874245010122e-06	1.46030011037387e-05	Down
IRS2	7.78493502857143	8.01227483333333	0.227339804761904	5.19627394352318e-05	0.00022910844205534	Up
KIF2A	8.069	7.83134555555556	-0.23765	1.61093544770678e-05	8.01337120141322e-05	Down
LDHA	9.75250885714286	10.5017405833333	0.749231726190477	6.33255031590309e-12	1.89999825736248e-10	Up
LHPP	8.02114225714286	7.70265163888889	-0.318491	2.8037144422308e-08	2.47236637178534e-07	Down
MDH2	11.5408540571429	11.3790510277778	-0.161803	0.000243293822439497	0.00094398003106525	Down
ME2	7.91320222857143	8.04556397222222	0.132361743650794	0.00197545604238024	0.00660755986589253	Up
MERTK	6.94426702857143	8.02245711111111	1.07819008253968	7.5007814303376e-11	1.61683510831722e-09	Up
MET	7.01635182857143	8.00962238888889	0.993270560317461	4.88270004427061e-15	3.15747936196166e-13	Up
MIF	10.2579472285714	10.5797481944444	0.321800965873017	8.37158880705279e-05	0.0003530626583844	Up
NASP	6.96689685714286	6.89697561111111	-0.0699212	0.00209380363200941	0.00688471024762418	Down
NDUFV3	6.80638137142857	6.75598652777778	-0.0503948	0.000332750574241119	0.00126575708632896	Down
NOL3	6.67470648571429	6.75606586111111	0.0813593753968247	3.33145863245711e-05	0.000153881660642066	Up
P4HA1	7.09229125714286	7.48675	0.394458242857143	3.49136781651535e-08	2.94489285393034e-07	Up
P4HA2	6.70487965714286	6.74173	0.0368505928571423	0.00463577264145549	0.0147432769252847	Up
PAXIP1	7.45118	7.35375186111111	-0.0974251	0.00072443854936553	0.00255529233776205	Down
PGAM1	8.14367908571429	8.45679141666667	0.31311233095238	5.03054881333123e-05	0.000226959644136339	Up
PGK1	9.74878234285714	10.2164498055556	0.467667462698412	4.23405328565743e-10	6.31851028782724e-09	Up
PHKA2	7.83442534285714	7.59785208333333	-0.236573	1.88175409523602e-05	9.12650736189471e-05	Down
PPP2CB	7.41170165714286	7.62782011111111	0.216118453968254	1.22864223099015e-06	7.94521976040296e-06	Up
PYGL	7.80301602857143	8.39135872222222	0.588342693650794	3.34146902381514e-06	1.96437875945496e-05	Up
QSOX1	7.68385068571429	8.63736277777778	0.953512092063492	8.96083079932453e-16	8.6920058753448e-14	Up
RRAGD	7.48790097142857	8.14219669444445	0.654295723015874	6.76535249373383e-09	7.2915465765798e-08	Up
SDC1	6.75976325714286	6.81647102777778	0.0567077706349206	0.000692541520440389	0.00248801953639695	Up
SDC2	7.00935454285714	7.80080666666667	0.791452123809524	2.36527131037961e-12	1.14715658553411e-10	Up
SLC16A3	9.11135877142857	10.5774749444444	1.46611617301587	5.47346492559666e-10	7.07901463710502e-09	Up
SLC25A13	7.25013594285714	7.40944827777778	0.159312334920635	0.000238165687852121	0.000942941702924723	Up
TALDO1	8.71509854285714	9.00649916666667	0.291400623809523	4.33320269842417e-06	2.46849412109711e-05	Up
TGFA	6.94307945714286	7.27412447222222	0.331045015079365	2.9453840217118e-09	3.57127812632555e-08	Up
TKTL1	7.27434431428571	6.94007130555556	-0.334273	4.58357126955622e-07	3.0662511251514e-06	Down
TPI1	10.2761037428571	10.8552734722222	0.579169729365081	1.77064203433668e-07	1.32117136408198e-06	Up
TPST1	6.73492225714286	7.03900094444444	0.304078687301587	1.31569894327409e-06	8.23372887081203e-06	Up
TXN	10.8279948857143	11.8095253611111	0.981530475396825	3.26789173731353e-10	5.76337270035295e-09	Up
UGP2	7.63047925714286	7.75068191666667	0.120202659523809	1.61992843934707e-07	1.25706446893333e-06	Up
VCAN	8.88555948571429	10.9763998333333	2.09084034761905	1.33413115339558e-08	1.29410721879371e-07	Up
VEGFA	6.67885	6.95431269444444	0.275461494444444	4.07588103205313e-10	6.31851028782724e-09	Up
VLDLR	6.59386682857143	6.64353094444444	0.049664115873016	0.000632573369997926	0.00231545724112448	Up
